# Supplementary material for: Superparamagnetic Multifunctionalized Chitosan Nanohybrids for Efficient Copper Adsorption: Comparative Performance, Stability, and Mechanism Insights
Source: MDPI journal article supplement (doi:10.3390/polym15051157), 2023-02-24
Supplement: s1 [file s1]

## Supporting Information

### **Superparamagnetic Multifunctionalized-Chitosan Nanohybrids for Efficient Copper adsorption: Comparative Performance, Stability, and Mechanism Insights**

**Ahmed A. Al-Ghamdi <sup>1</sup>, Ahmed A. Galhoum <sup>2</sup>, Ahmed Alshahrie <sup>1,3</sup>,  
Yusuf A. Al-Turki <sup>4,5</sup>, Amal M. Al-Amri <sup>6</sup> and S. Wageh <sup>1,\*</sup>**

1 Department of Physics, Faculty of Science, King Abdulaziz University, Jeddah 21589, Saudi Arabia

2 Nuclear Materials Authority, El-Maadi, Cairo P.O. Box 530, Egypt

3 Centre of Nanotechnology, King Abdulaziz University, Jeddah 21589, Saudi Arabia

4 Department of Electrical and Computer Engineering, Faculty of Engineering, King Abdulaziz University,  
Jeddah 21589, Saudi Arabia

5 K. A. CARE Energy Research and Innovation Center, King Abdulaziz University,  
Jeddah 21589, Saudi Arabia

6 Physics Department, Rabigh College of Science and Arts, King Abdulaziz University,  
P.O. Box 344, Rabigh 21911, Saudi Arabia

\* Correspondence: wswelm@kau.edu.sa

## Section S1 – Material and methods

### S1.1. Characterization

(C, H, and N) was determined using an automatic analyzer (CHNS Vario EL III-elementar analyzer, Elementar, Germany). A Philips X-ray generator type PW 3710/31, Cu K $\alpha$  ( $\lambda=1.544$ ) (Philips, Japan) was used to measure X-ray diffraction. The FTIR spectra were analyzed by a Thermo-Fisher Nicolet IS10 spectrometer (Waltham, MA, USA). The morphology and size distribution were analyzed by TEM-JEOL-2100 transmission electron microscope (JOEL, Tokyo, Japan). The magnetic characteristics were determined using a vibrating sample magnetometer (VSM; 730T, Lakeshoper, USA). The energy-dispersive X-ray spectroscopy (EDX, a ESEM model Philips XL 30, Eindhoven, Netherlands) was used to assess the chemical analysis. A Quantachrome NOVA 3200 (Boynton Beach, FL, USA) analyzer was used to measure the surface area using N<sub>2</sub>-adsorption isotherms under a degassing temperature of 40 °C for 12 hours, while the pore volume was measured according to the BJH method. The K-Alpha spectrometer (Thermo Fisher Scientific, Waltham, USA) was used to acquire X-ray photoelectron spectroscopy (XPS) data using a monochromatic Al K $\alpha$ -radiation source (200 W). The sorbent's pH zero-point of charge (pH<sub>ZPC</sub>) was measured using the pH-drift method [1, 2]: the sorbents were equilibrated for 48 h under agitation with a series of 0.1 M NaCl solutions with different initial pH-values (pH<sub>0</sub>); the equilibrium pH (pH<sub>eq</sub>) was recorded and the pH<sub>ZPC</sub> is the pH at which  $\Delta\text{pH}=0$ .

**Table S1.** Selected kinetics and adsorption isotherms models [3, 4].

| Process   | Model                     | Equation                                                                                                                                                                                                         | Parameters                                              |                                                    |
|-----------|---------------------------|------------------------------------------------------------------------------------------------------------------------------------------------------------------------------------------------------------------|---------------------------------------------------------|----------------------------------------------------|
| Kinetics  | PFORE                     | $q(t) = q_{eq,1}(1 - e^{k_1 t})$                                                                                                                                                                                 | $q_{eq,1}$<br>(mmol g <sup>-1</sup> )                   | $k_1$<br>(min <sup>-1</sup> )                      |
|           | PSORE                     | $q(t) = \frac{q_{eq,2}^2 \times k_2 \times t}{1 + q_{eq,2} \times k_2 \times t}$                                                                                                                                 | $q_{eq,2}$<br>(mmol g <sup>-1</sup> )                   | $k_2$<br>(L mmol <sup>-1</sup> min <sup>-1</sup> ) |
|           | sRIDE<br>(Weber & Morris) | $q(t) = k_{int,i} \cdot t^{0.5} + C$<br><br>Several linear sections corresponding to different regimes of resistance (i) to intraparticle diffusion may co-exist ( $K_{int,i}$ ) (linear regression calculation) | $K_{int,i}$ (mmol g <sup>-1</sup> min <sup>-0.5</sup> ) |                                                    |
| Isotherms | Langmuir                  | $\frac{C_{eq}}{q_{eq}} = \frac{C_{eq}}{q_{max}} + \frac{1}{b q_{max}}$                                                                                                                                           | $q_{max}$<br>(mmol g <sup>-1</sup> )                    | $b_L$<br>(L mmol <sup>-1</sup> )                   |
|           | Freundlich                | $q = k_F C_{eq}^{1/n}$                                                                                                                                                                                           | $k_F$                                                   | $N$<br>(dimensionless)                             |
|           | Temkin                    | $q_{eq} = B_T \ln C_{eq} + B_T \ln A_T$<br><br>Where, $B_T = \frac{RT}{b_T}$                                                                                                                                     | $A_T$<br>(L mmol <sup>-1</sup> )                        | $b_T$<br>(J mol <sup>-1</sup> )                    |

**Table S2.** Effect of functionality on the adsorbent feature and adsorption characteristics.

| Properties                                                           | rCS                | MCS                | CMCS  | ACMC<br>S | TA-<br>type        | A-type             | S-type             | C-type             |
|----------------------------------------------------------------------|--------------------|--------------------|-------|-----------|--------------------|--------------------|--------------------|--------------------|
| Magnetic saturation (Ms, emu/g)                                      | -                  | 42.966             | -     | -         | 31.134             | 26.944             | 23.206             | 22.837             |
| Coercive field ( $H_c$ )                                             | -                  | 57.166             | -     | -         | 22.694             | 24.609             | 46.112             | 39.811             |
| Remanence ( $M_r$ )                                                  | -                  | 0.721              | -     | -         | 0.578              | 0.271              | 0.897              | 0.754              |
| Calculated particle size: From TEM (nm)                              | -                  | -                  | -     | -         | 8.45<br>$\pm 1.4$  | 10.43<br>$\pm 1.9$ | 14.79<br>$\pm 3.2$ | 14.01<br>$\pm 3.7$ |
| : From XRD (nm)                                                      | -                  | -                  | -     | -         | 9.01               | 9.43               | 10.83              | 9.78               |
| C, (%)                                                               | 39.99              | 18.91              | 18.35 | 15.82     | 18.34              | 17.48              | 16.59              | 20.51              |
| H, (%)                                                               | 6.88               | 4.07               | 3.93  | 3.23      | 3.76               | 2.93               | 2.87               | 4.01               |
| N (%)                                                                | 7.79               | 3.58               | 3.06  | 1.98      | 5.21               | 3.77               | 3.62               | 3.29               |
| N (mmol g <sup>-1</sup> )                                            | 5.56               | 2.56               | 2.18  | 1.41      | 3.72               | 2.69               | 2.58               | 2.35               |
| S, (%)                                                               | -                  | -                  | -     | -         | -                  | -                  | -                  | 3.01               |
| Specific surface area ( $S_{BET}$ , m <sup>2</sup> g <sup>-1</sup> ) | -                  | -                  | -     | -         | 75.27              | 60.382             | 61.052             | 42.56              |
| $V_P$ (cm <sup>3</sup> STP g <sup>-1</sup> )                         | -                  | -                  | -     | -         | 0.5696             | 0.3598             | 0.4105             | 0.1134             |
| Mean pore diameter (nm)                                              | -                  | -                  | -     | -         | 27.533             | 22.466             | 26.997             | 3.839              |
| pH <sub>ZPC</sub>                                                    | 8.57<br>$\pm 0.02$ | 7.26<br>$\pm 0.03$ | -     | -         | 8.48<br>$\pm 0.02$ | 7.88<br>$\pm 0.01$ | 7.66<br>$\pm 0.02$ | 7.78<br>$\pm 0.03$ |
| Optimum pH <sub>0</sub>                                              | -                  | 5.0-6.0            | -     | -         | 5                  | 5                  | 5                  | 5                  |
| Teq (min)                                                            | -                  | 240                | -     | -         | 30                 | 90                 | 60                 | 50                 |
| $q_{m,exp}$ (mmol Cu.g <sup>-1</sup> )@ 328 K                        | -                  | 0.985              | -     | -         | 2.946              | 1.697              | 1.735              | 1.913              |
| $b_L$ (L mmol <sup>-1</sup> ) at 328 K                               | -                  | 1.364              | -     | -         | 3.257              | 1.759              | 2.042              | 2.088              |
| $\Delta H^\circ$ (kJ mol <sup>-1</sup> )                             | -                  | 8.623              | -     | -         | -10.045            | 12.033             | 9.253              | 6.527              |
| $\Delta S^\circ$ (J mol <sup>-1</sup> K <sup>-1</sup> )              | -                  | 119.52             | -     | -         | 70.12              | 132.26             | 124.86             | 116.92             |
| The cumulative $q_m$ (mmol g <sup>-1</sup> ) in complexed solution   |                    | 1.163              |       |           | 3.329              | 1.954              | 2.122              | 2.073              |
| Sensitivity in complexed solution*                                   | -                  | -35.1%             | -     | -         | -47.3%             | -27.7%             | -29.5%             | -24.8%             |

**Table S3.** Analysis of XPS spectra: assignment of the core-level signals (BEs and AF).

| Name  | TA-type    |           | TA-type+Cu |           | A-type      |            | S-type      |            | C-type     |           | C-type+Cu  |           | Chemical assignments                                  |
|-------|------------|-----------|------------|-----------|-------------|------------|-------------|------------|------------|-----------|------------|-----------|-------------------------------------------------------|
|       | BE<br>(eV) | AF<br>(%) | BE<br>(eV) | AF<br>(%) | BE,<br>(eV) | AF,<br>(%) | BE,<br>(eV) | AF,<br>(%) | BE<br>(eV) | AF<br>(%) | BE<br>(eV) | AF<br>(%) |                                                       |
| C1s   | 285.56     | 51.59     | 284.53     | 15.04     | 286.78      | 55.56      | 286.66      | 91.23      | 285.36     | 22.88     | 284.76     | 19.11     | C-H, C-C, C <sub>advent.</sub>                        |
|       | 286.23     | 26.66     | 286.03     | 62.82     | 288.09      | 42.42      | 288.16      | 3.04       | 286.37     | 24.32     | 286.05     | 47.37     | C-OH, C-N, C-O-C, C-S                                 |
|       | 287.49     | 21.75     | 287.66     | 13.48     | 288.25      | 2.02       | 289.22      | 5.74       | 287.23     | 52.8      | 287.55     | 33.51     | $\pi$ - $\pi^*$ sat., C=O (Amide)                     |
|       |            |           | 288.12     | 8.66      |             |            |             |            |            |           |            |           | -COOH                                                 |
| N1s   | 399.12     | 60.32     | 399.52     | 65        | 400.55      | 51.39      | 399.27      | 33.4       | 399.54     | 64.37     | 399.51     | 60.24     | C-N (amide), N-H                                      |
|       | 399.58     | 39.68     | 401.77     | 9.08      | 400.67      | 48.61      | 400.41      | 66.6       | 401.36     | 35.63     | 401.29     | 25.03     | -NH <sub>2</sub> , >NH (amine)                        |
|       |            |           | 406.39     | 25.92     |             |            |             |            |            |           | 406.59     | 14.74     | NO <sub>2</sub> (nitrite ions)                        |
| O1s   | 529.61     | 30.14     | 529.54     | 14.18     | 530.82      | 26.73      | 529.7       | 11         | 530.17     | 20.29     | 529.99     | 19.09     | Lattice O (Fe-O, Fe <sub>3</sub> O <sub>4</sub> )     |
|       | 530.87     | 7.32      | 530.57     | 24.22     | 533.23      | 69.52      | 530.89      | 31.13      | 531.99     | 42.76     | 532.37     | 77.91     | C=O, O-C=O                                            |
|       | 532.51     | 62.54     | 532.4      | 61.6      | 534.76      | 3.76       | 533.03      | 57.87      | 532.98     | 36.95     |            |           | C-OH, H <sub>2</sub> O, C-O-C                         |
|       |            |           |            |           |             |            |             |            |            |           | 535.14     | 3.00      | NO <sub>2</sub> <sup>-</sup> (nitrite ions)           |
| Fe 2p | 710.27     | 30.9      | 710.27     | 16.58     | 711.67      | 37.14      | 711.01      | 31.23      | 710.68     | 31.18     | 710.48     | 26.99     | Fe 2p <sub>3/2</sub> (Fe <sup>3+</sup> -octa)         |
|       | 712.81     | 18.42     | 712.16     | 25.87     | 714.19      | 15.37      | 713.59      | 17.67      | 713.23     | 19.42     | 713.02     | 21.19     | Fe 2p <sub>3/2</sub> (multipl-Fe <sup>2+</sup> -octa) |
|       | 716.45     | 7.7       | 715.81     | 9.58      | 717.51      | 7.82       | 717.18      | 7.97       | 716.96     | 7.97      | 716.89     | 9.36      | Fe 2p <sub>3/2</sub> (Fe <sup>3+</sup> -tetra)        |
|       | 719.47     | 8.93      | 719.43     | 11.31     | 720.81      | 8.68       | 720.41      | 9.44       | 719.99     | 8.72      | 720.21     | 9.73      | Fe 2p <sub>1/2</sub> (Fe <sup>3+</sup> -Satallite)    |
|       | 723.80     | 19.92     | 724.02     | 20.44     | 725.01      | 18.49      | 724.60      | 19.97      | 724.31     | 19.88     | 724.25     | 20.29     | Fe 2p <sub>1/2</sub> (Fe <sup>2+</sup> -octa)         |
|       | 727.12     | 8.78      | 727.24     | 9.77      | 727.92      | 9.03       | 727.96      | 8.49       | 727.69     | 7.8       | 727.71     | 7.61      | Fe 2p <sub>1/2</sub> (Fe <sup>3+</sup> -tetra)        |
|       | 732.42     | 5.35      | 732.38     | 6.45      | 732.9       | 3.48       | 733         | 5.22       | 732.39     | 4.97      | 732.58     | 4.83      | Fe 2p <sub>3/2</sub> (Fe <sup>3+</sup> -octa)         |
| S 2p  |            |           |            |           |             |            |             |            |            |           | 163.38     | 25.17     | C-S (2p <sub>3/2</sub> )                              |
|       |            |           |            |           |             |            |             |            | 164.17     | 82.27     | 164.16     | 42.83     | C-S (2p <sub>3/2</sub> )                              |
|       |            |           |            |           |             |            |             |            | 168.05     | 17.73     | 168.04     | 32        | C-S-C (S 2p <sub>1/2</sub> )                          |

|       |        |       |        |       |                                                     |
|-------|--------|-------|--------|-------|-----------------------------------------------------|
| Cu 2p | 933.38 | 35.58 | 932.70 | 23.76 | Cu 2p <sub>3/2</sub> (Cu <sup>+</sup> )             |
|       | 935.52 | 11.45 | 934.73 | 29.47 | Cu 2p <sub>3/2</sub> (Cu <sup>2+</sup> )            |
|       | 940.51 | 10.09 | 954.45 | 11.1  | Cu 2p <sub>3/2</sub> (Cu <sup>+</sup> - Satallite)  |
|       | 943.89 | 10.59 | 940.79 | 9.76  | Cu 2p <sub>3/2</sub> (Cu <sup>2+</sup> - Satallite) |
|       | 952.94 | 19.19 | 944.26 | 9.89  | Cu 2p <sub>1/2</sub> (Cu <sup>+</sup> )             |
|       | 955.89 | 7.23  | 952.56 | 16.02 | Cu 2p <sub>1/2</sub> (Cu <sup>2+</sup> )            |
|       | 961.46 | 5.87  |        |       | Cu 2p <sub>1/2</sub> (Cu <sup>2+</sup> )            |

**Table S4.** FTIR chemical assignments

| Chemical Assignment                                                                       | Wavenumber, cm <sup>-1</sup> |             |               |             |             |             |             |              | Ref.       |
|-------------------------------------------------------------------------------------------|------------------------------|-------------|---------------|-------------|-------------|-------------|-------------|--------------|------------|
|                                                                                           | TA-type                      | TA-type +Cu | TA-type Aft.* | A-type      | S-type      | C-type      | C-type + Cu | C-type Aft.* |            |
| -NH <sub>2</sub> $\nu$ as                                                                 | 3468                         | 3510        |               |             |             |             | 3489        |              | [1, 5]     |
| -NH <sub>2</sub> $\nu$ s                                                                  | 3391                         | 3428        |               |             |             |             |             |              | [1, 5]     |
| >NH $\nu$ , -OH $\nu$ s (Overlaped)                                                       | 3436                         | 3453        | 3445          | 3432        | 3445        | 3436        | 3416        | 3454         | [5-7]      |
| C-H $\nu$ as                                                                              | 2923                         | 2927        | 2944          | 2923        | 2936        | 2927        | 2931        | 2932         | [1, 8]     |
| C-H $\nu$ s                                                                               | 2858                         | 2851        | 2865          | 2853        | 2869        | 2857        | 2858        | 2868         | [5, 8]     |
| CO <sub>2</sub> H-bonding                                                                 | 2422, 2391                   | 2365, 2344  | 2439, 2402    | 2357, 2334  | 2365, 2336  | 2435, 2356  | 2427, 2373  | 2433, 2407   | [9]        |
| C=O $\nu$ s (Amide I), and (1°/2°) amine bend. overlapping                                | 1602                         | 1609        | 1605          | 1602        | 1609        | 1609        | 1610        | 1605         | [7, 8]     |
| N-H bend. (Amide II), (primary amine), C-H and (1°/2°) OH bend. and COO <sup>-</sup> salt | 1411                         | 1412        | 1412          | 1408        | 1412        | 1404        | 1400        | 1412         | [8, 10]    |
| C-N $\nu$ , CH <sub>2</sub> sym. def., -C-O str. (1° -OH $\nu$ s)                         | 1388                         | 1388        | 1388          | 1388        | 1387        | 1392        | 1387        | 1388         | [2, 8]     |
| C-N stretching                                                                            | 1330 - 1261                  | 1330 - 1256 | 1339-1277     | 1330 - 1265 | 1339 - 1281 | 1330 - 1265 | 1329 - 1261 | 1334 - 1264  | [2, 11]    |
| C-O-C bridge $\nu$ s                                                                      | 1117                         | 1113        | 1121          | 1113        | 1117        | 1113        | 1112        | 1116         | [8]        |
| C-O $\nu$ s, primary OH groups, carbohydrate ring                                         | 932                          | 936         | 936           | 928         | 933         | 932         | 936         | 932          | [5, 8]     |
| C-H out-of-plane bend.                                                                    | 813                          | 854         | 854           | 846         | 798         | 855         | 853         | 858          | [11]       |
| -NH twist                                                                                 | 714                          | 714         | 723           | 710         | 719         | 722         | 714         | 718          | [1, 5]     |
| Fe-O-Fe $\nu$ s and C-H bending                                                           | 616                          | 624         | 624           | 616         | 624         | 627         | 624         | 620          | [1, 6, 12] |
| $\nu$ 1 of the bulk Fe <sub>3</sub> O <sub>4</sub> (Fe <sub>tetra</sub> -O)               | 541                          | 554         | 558           | 558         |             | 591         | 541         | 558          | [11, 12]   |
| bulk magnetite's $\nu$ 2 (Fe <sub>Octa</sub> -O bond)                                     | 472                          | 475         | 476           | 473         | 480         | 480         | 456         | 467          | [4, 10]    |

\* TA-type Aft. 6<sup>th</sup> regeneration cycles

**Table S5.** Adsorption kinetics parameters of Cu(II) adsorption.

| Sorbent | $q_{m, \text{exp.}}^*$ | PFORE                  |          |        | PSORE                  |              |        | Intraparticle diffusion |                  |                  |
|---------|------------------------|------------------------|----------|--------|------------------------|--------------|--------|-------------------------|------------------|------------------|
|         |                        | $K_1, \text{min}^{-1}$ | $q_e,^*$ | $R^2$  | $K_2, \text{min}^{-1}$ | $q_{e,2},^*$ | $R^2$  | $K_{id,1},^{**}$        | $K_{id,2},^{**}$ | $K_{id,3},^{**}$ |
| r-MCS   | 0.40191357             | 0.01681                | 0.273    | 0.9515 | 193.537088             | 0.41955108   | 0.9939 | 0.0356                  | 0.0160           | 0.0015           |
| TA-type | 1.57932836             | 0.08268                | 1.183    | 0.9231 | 0.50392365             | 1.60745861   | 0.9994 | 0.3456                  | 213.0000         | 0.0002           |
| A-type  | 0.71916407             | 0.05182                | 0.470    | 0.9643 | 8.48194967             | 0.75528701   | 0.9992 | 0.1116                  | 0.0192           | 0.0023           |
| S-type  | 0.81484279             | 0.05435                | 0.576    | 0.9481 | 7.10973499             | 0.850051     | 0.9989 | 0.1409                  | 0.0611           | 0.0026           |
| C-type  | 0.91650143             | 0.08314                | 0.866    | 0.9758 | 5.11265545             | 0.95556617   | 0.9986 | 0.162                   | 0.063            | 0.14             |

Units: \*: mmol Cu. g<sup>-1</sup>, \*\*: mg g<sup>-1</sup> min<sup>-0.5</sup>



**Table S6.** Adsorption isotherms parameters of Cu(II) adsorption.

| Sorbent | T,<br>K | $q_{m, \text{Exp}}^a$ | Langmuir isotherm |         |        | Freundlich isotherm |         |        | Temkin isotherm |         |        |
|---------|---------|-----------------------|-------------------|---------|--------|---------------------|---------|--------|-----------------|---------|--------|
|         |         |                       | $q_{m,L}^a$       | $b_L^b$ | $R^2$  | $1/n$               | $k_f^a$ | $R^2$  | $A_T^c$         | $B_T^d$ | $R^2$  |
| r-MCS   | 298     | 0.8614                | 1.0349            | 0.9877  | 0.9908 | 0.4382              | 0.4598  | 0.9699 | 10.5941         | 0.2184  | 0.9552 |
|         | 308     | 0.9067                | 1.0735            | 1.0728  | 0.9911 | 0.4188              | 0.4970  | 0.9705 | 11.9819         | 0.2228  | 0.9665 |
|         | 318     | 0.9448                | 1.1046            | 1.1828  | 0.9935 | 0.4064              | 0.5323  | 0.9694 | 13.4086         | 0.2274  | 0.9660 |
|         | 328     | 0.9845                | 1.1305            | 1.3639  | 0.9962 | 0.3905              | 0.5753  | 0.9678 | 15.7841         | 0.2302  | 0.9721 |
| TA-type | 298     | 3.2647                | 3.4258            | 4.7696  | 0.9973 | 0.3031              | 2.4138  | 0.9613 | 148.2945        | 0.5161  | 0.9866 |
|         | 308     | 3.1703                | 3.3411            | 4.1512  | 0.9969 | 0.3116              | 2.2877  | 0.9752 | 120.2412        | 0.5135  | 0.9789 |
|         | 318     | 3.0507                | 3.2352            | 3.7834  | 0.9967 | 0.3146              | 2.1727  | 0.9794 | 106.1868        | 0.5024  | 0.9768 |
|         | 328     | 2.9456                | 3.1397            | 3.2566  | 0.9958 | 0.3213              | 2.0389  | 0.9843 | 87.0167         | 0.4954  | 0.9693 |
| A-type  | 298     | 1.4755                | 1.7609            | 1.1342  | 0.9962 | 0.4890              | 0.8006  | 0.9380 | 11.1496         | 0.3848  | 0.9768 |
|         | 308     | 1.5441                | 1.8038            | 1.3257  | 0.9975 | 0.4621              | 0.8768  | 0.9333 | 13.3378         | 0.3876  | 0.9788 |
|         | 318     | 1.6344                | 1.8660            | 1.5592  | 0.9988 | 0.4354              | 0.9669  | 0.9263 | 16.4364         | 0.3911  | 0.9832 |
|         | 328     | 1.6974                | 1.9124            | 1.7594  | 0.9990 | 0.4219              | 1.0342  | 0.9102 | 18.9993         | 0.3957  | 0.9807 |
| S-type  | 298     | 1.5438                | 1.7784            | 1.4537  | 0.9980 | 0.4430              | 0.8978  | 0.9356 | 11.1496         | 0.3848  | 0.9768 |
|         | 308     | 1.5998                | 1.8272            | 1.5878  | 0.9982 | 0.4373              | 0.9519  | 0.9145 | 13.3378         | 0.3876  | 0.9788 |
|         | 318     | 1.6671                | 1.8797            | 1.7955  | 0.9990 | 0.4153              | 0.9757  | 0.9165 | 16.4364         | 0.3911  | 0.9832 |
|         | 328     | 1.7348                | 1.9268            | 2.0417  | 0.9993 | 0.3985              | 1.0965  | 0.9059 | 18.9993         | 0.3957  | 0.9807 |
| C-type  | 298     | 1.7030                | 1.9361            | 1.6418  | 0.9984 | 0.4277              | 1.0221  | 0.9342 | 14.9259         | 0.3772  | 0.9792 |
|         | 308     | 1.7660                | 1.9865            | 1.8213  | 0.9970 | 0.4184              | 1.0857  | 0.9216 | 16.4644         | 0.3854  | 0.9752 |
|         | 318     | 1.8550                | 2.0708            | 1.9718  | 0.9987 | 0.4090              | 1.1620  | 0.9159 | 19.6446         | 0.3867  | 0.9771 |
|         | 328     | 1.9133                | 2.1277            | 2.0880  | 0.9989 | 0.4048              | 1.2154  | 0.9067 | 23.3244         | 0.3885  | 0.9767 |

Units: <sup>a</sup>: mmol Cu.g<sup>-1</sup>, <sup>b</sup>: L mmol<sup>-1</sup>, <sup>c</sup>Ar: L mmol<sup>-1</sup>, and <sup>d</sup>Br: kJ mol<sup>-1</sup>.

**Table S7.** Thermodynamic parameters for Cu(II) adsorption.

| Sorbent | Temp.,<br>(K) | $\Delta H^\circ$ ,<br>(KJ mol <sup>-1</sup> ) | $\Delta S^\circ$ ,<br>(J mol <sup>-1</sup> ) | $\Delta G^\circ$ ,<br>(KJ mol <sup>-1</sup> ) | $T\Delta S^\circ$ ,<br>(KJ mol <sup>-1</sup> ) | R <sup>2</sup> |
|---------|---------------|-----------------------------------------------|----------------------------------------------|-----------------------------------------------|------------------------------------------------|----------------|
| r-MCS   | 298           | 8.623                                         | 119.52                                       | -26.99                                        | 35.62                                          | 0.9759         |
|         | 308           |                                               |                                              | -28.19                                        | 36.81                                          |                |
|         | 318           |                                               |                                              | -29.38                                        | 38.01                                          |                |
|         | 328           |                                               |                                              | -30.58                                        | 39.20                                          |                |
| TA-type | 298           | -10.045                                       | 70.12                                        | -30.94                                        | 20.89                                          | 0.9909         |
|         | 308           |                                               |                                              | -31.64                                        | 21.60                                          |                |
|         | 318           |                                               |                                              | -32.34                                        | 22.30                                          |                |
|         | 328           |                                               |                                              | -33.04                                        | 23.00                                          |                |
| A-type  | 298           | 12.033                                        | 132.26                                       | -27.38                                        | 39.41                                          | 0.9983         |
|         | 308           |                                               |                                              | -28.70                                        | 40.74                                          |                |
|         | 318           |                                               |                                              | -30.03                                        | 42.06                                          |                |
|         | 328           |                                               |                                              | -31.35                                        | 43.38                                          |                |
| S-type  | 298           | 9.253                                         | 124.86                                       | -27.96                                        | 37.21                                          | 0.9878         |
|         | 308           |                                               |                                              | -29.20                                        | 38.46                                          |                |
|         | 318           |                                               |                                              | -30.45                                        | 39.71                                          |                |
|         | 328           |                                               |                                              | -31.70                                        | 40.95                                          |                |
| C-type  | 298           | 6.527                                         | 116.92                                       | -28.32                                        | 34.84                                          | 0.9899         |
|         | 308           |                                               |                                              | -29.48                                        | 36.01                                          |                |
|         | 318           |                                               |                                              | -30.65                                        | 37.18                                          |                |
|         | 328           |                                               |                                              | -31.82                                        | 38.35                                          |                |

**Table S8.** Metal desorption and adsorption cycles.

| Cycles                  | r-MCS        |             | TA-type     |             | A-type      |             | S-type      |             | C-type      |             |
|-------------------------|--------------|-------------|-------------|-------------|-------------|-------------|-------------|-------------|-------------|-------------|
|                         | SE, %        | DE, (%)     | SE, %       | DE, (%)     | SE, %       | DE, (%)     | SE, %       | DE, (%)     | SE, %       | DE, (%)     |
| I                       | 100.0*       | 98.69       | 100.0*      | 98.95       | 100.0*      | 99.04       | 100.0*      | 99.14       | 100.0*      | 99.09       |
| II                      | 97.69        | 96.89       | 98.98       | 98.19       | 98.12       | 98.01       | 98.55       | 98.06       | 98.45       | 98.35       |
| III                     | 96.42        | 95.26       | 98.13       | 97.48       | 94.84       | 97.18       | 93.72       | 97.23       | 97.35       | 97.93       |
| IV                      | 93.79        | 93.11       | 97.11       | 97.01       | 93.26       | 95.25       | 92.66       | 96.31       | 95.00       | 95.64       |
| V                       | 91.48        | 90.96       | 95.97       | 96.58       | 92.43       | 94.35       | 91.72       | 95.88       | 93.55       | 94.83       |
| VI                      | 89.25        | 90.13       | 94.84       | 94.45       | 91.64       | 93.81       | 90.98       | 94.13       | 92.40       | 94.42       |
| $\Delta(1^{st}/6^{th})$ | <b>10.75</b> | <b>8.56</b> | <b>5.16</b> | <b>4.49</b> | <b>8.36</b> | <b>5.23</b> | <b>9.02</b> | <b>5.00</b> | <b>7.60</b> | <b>4.67</b> |

\*Standard metal ion sorption efficiency (at first cycle). **Adsorption experiment:** (Co: 1.0 mmol.L<sup>-1</sup>; SD: 0.5 g.L<sup>-1</sup>; pH: 5, Time: 2h, T: 298 K). **Desorption experiment:** (acidified thiourea: 0.25 mol.L<sup>-1</sup> at pH: 2.0; SD: 1.0 g.L<sup>-1</sup>; Time: 1h; T: 298 K)

**Table S9.** Chemical properties of selected metal ions.

| Element | At.<br>No. | Hydrated<br>Species                             | M-O<br>bond<br>Distance<br>(Å) | M <sup>n+</sup><br>ion<br>radius<br>(Å) | M <sup>n+</sup> ion<br>radius,<br>(Å) <sup>b</sup> | Effective<br>ionic<br>charge | Electronegativity<br>(Pauling units) | qm, mmol metal g <sup>-1</sup> |             |            |            |        |
|---------|------------|-------------------------------------------------|--------------------------------|-----------------------------------------|----------------------------------------------------|------------------------------|--------------------------------------|--------------------------------|-------------|------------|------------|--------|
|         |            |                                                 |                                |                                         |                                                    |                              |                                      | r-MCS                          | TA-<br>type | A-<br>type | S-<br>type | C-type |
| Co      | 27         | Co(H <sub>2</sub> O) <sub>6</sub> <sup>2+</sup> | 2.08                           | 0.74                                    | 0.745                                              | 12.95                        | 1.88                                 | 0.23                           | 0.56        | 0.32       | 0.39       | 0.08   |
| Ni      | 28         | Ni(H <sub>2</sub> O) <sub>6</sub> <sup>2+</sup> | 2.055                          | 0.715                                   | 0.69                                               | 13.6                         | 1.91                                 | 0.18                           | 0.48        | 0.26       | 0.24       | 0.23   |
| Cu      | 29         | Cu(H <sub>2</sub> O) <sub>6</sub> <sup>2+</sup> | 2.14                           | 0.73                                    | 0.6                                                | 14.25                        | 1.9                                  | 0.58                           | 1.73        | 1.07       | 1.10       | 1.29   |
| Zn      | 30         | Zn(H <sub>2</sub> O) <sub>6</sub> <sup>2+</sup> | 2.08                           | 0.74                                    | 0.74                                               | 14.9                         | 1.65                                 | 0.13                           | 0.41        | 0.19       | 0.30       | 0.21   |
| Cd      | 48         | Cd(H <sub>2</sub> O) <sub>6</sub> <sup>2+</sup> | 2.3                            | 0.96                                    | 0.95                                               | 16.4                         | 1.69                                 | 0.06                           | 0.15        | 0.10       | 0.09       | 0.26   |

**Table S10.** The parameters and constants of Generalized Langmuir equation and Goodness of fit for all adsorbents.

$$q_{(pH_0, C_0)} = \frac{q_m \times k \times pH^m \times C^n}{(1 + k \times pH^f \times C^e)^g}$$

| Parameters                           | Adsorbent |          |          |          |          |
|--------------------------------------|-----------|----------|----------|----------|----------|
|                                      | r-MCS     | TA-type  | A-type   | S-type   | C-type   |
| $q_m, \text{mmol g}^{-1}$            | 0.860     | 3.290    | 1.480    | 1.550    | 1.711    |
| k                                    | 0.8628    | 4.1660   | 0.9908   | 1.2700   | 1.4340   |
| m                                    | 5.0550    | 2.6150   | 33.7500  | 5.8270   | 5.7330   |
| n                                    | 1.6790    | 3.8500   | 14.5800  | 4.6990   | 4.8320   |
| f                                    | 1.2100    | 0.5000   | 2.3870   | 1.1000   | 1.2100   |
| e                                    | 0.3047    | 1.3250   | 1.0000   | 0.9622   | 1.1000   |
| g                                    | 4.5000    | 2.7140   | 14.2900  | 4.7950   | 4.2470   |
| $\Delta G^\circ, \text{kJ mol}^{-1}$ | -27.0351  | -30.9361 | -27.3779 | -27.9929 | -28.2938 |
| R <sup>2</sup>                       | 0.9812    | 0.9854   | 0.9930   | 0.9911   | 0.9905   |
| Adj. R <sup>2</sup>                  | 0.9700    | 0.9766   | 0.9884   | 0.9852   | 0.9829   |
| SSE $\times 10^{-3}$                 | 8.066     | 133.4    | 12.71    | 21.01    | 22.15    |

**Table 11.** Comparison for experimental adsorption capacity ( $q_{e,exp}$ ) and mathematically calculated ( $q_{e,cal.}$ ) for r-MCS, TA-type, A-type, S-type, and C-type adsorbents.

| Factor                                   | pH <sub>0</sub>                        | r-MCS        |             |          | TA-type        |                   |          | A-type         |                    |          | S-type       |              |          | C-type       |              |          |
|------------------------------------------|----------------------------------------|--------------|-------------|----------|----------------|-------------------|----------|----------------|--------------------|----------|--------------|--------------|----------|--------------|--------------|----------|
|                                          |                                        | $q_{e,exp.}$ | $q_{e,cal}$ | Error, % | $q_{e,exp.}^*$ | $q_{e,cal.}^{**}$ | Error, % | $q_{e,exp.}^*$ | $q_{e,cal.}^{**}$  | Error, % | $q_{e,exp.}$ | $q_{e,cal}$  | Error, % | $q_{e,exp.}$ | $q_{e,cal}$  | Error, % |
| pH <sub>0</sub>                          | 2.09                                   | 0.07         | 0.11        | -58.24   | 0.28           | 0.47              | -71.01   | 0.13           | 0.13               | 2.64     | 0.17         | 0.22         | -30.59   | 0.21         | 0.28         | -33.33   |
|                                          | 3.08                                   | 0.19         | 0.29        | -48.66   | 1.04           | 0.99              | 4.61     | 0.43           | 0.43               | 0.28     | 0.49         | 0.47         | 5.41     | 0.56         | 0.54         | 4.69     |
|                                          | 4.08                                   | 0.31         | 0.32        | -4.02    | 1.44           | 1.39              | 3.65     | 0.6            | 0.61               | -2.35    | 0.66         | 0.65         | 1.81     | 0.79         | 0.76         | 3.95     |
|                                          | 5.03                                   | 0.4          | 0.39        | 2.36     | 1.58           | 1.66              | -4.96    | 0.72           | 0.7                | 3.25     | 0.81         | 0.84         | -3.89    | 0.91         | 0.93         | -2.22    |
|                                          | 6.06                                   | 0.4          | 0.41        | -3.45    | 1.57           | 1.67              | -6.27    | 0.72           | 0.72               | 0.25     | 0.82         | 0.86         | -5.42    | 0.92         | 0.9          | 2.37     |
|                                          | 7.01                                   | 0.41         | 0.42        | -1.84    | 1.56           | 2.61              | -66.53   | 0.71           | 0.72               | -1.75    | 0.83         | 1.2          | -44.51   | 0.93         | 1.28         | -38.15   |
| Factor                                   | C <sub>0</sub> , mmol .L <sup>-1</sup> | r-MCS        |             |          | TA-type        |                   |          | A-type         |                    |          | S-type       |              |          | C-type       |              |          |
|                                          |                                        | $q_{e,exp.}$ | $q_{e,cal}$ | Error, % | $q_{e,exp.}^*$ | $q_{e,cal.}^{**}$ | Error, % | $q_{e,exp.}^*$ | $q_{e,calc.}^{**}$ | Error, % | $q_{e,exp.}$ | $q_{e,calc}$ | Error, % | $q_{e,exp.}$ | $q_{e,calc}$ | Error, % |
| C <sub>0</sub> , mmol Cu.L <sup>-1</sup> | 0.32                                   | 0.23         | 0.2105      | 8.48     | 0.6            | 0.55              | 7.78     | 0.2845         | 0.2657             | 6.61     | 0.3242       | 0.2957       | 8.79     | 0.361        | 0.325        | 9.97     |
|                                          | 0.65                                   | 0.32         | 0.3114      | 2.69     | 1.18           | 1.23              | -4.2     | 0.4951         | 0.5021             | -1.41    | 0.5722       | 0.616        | -7.65    | 0.6288       | 0.6779       | -7.81    |
|                                          | 1                                      | 0.39         | 0.3851      | 1.26     | 1.57           | 1.63              | -2.84    | 0.7165         | 0.6975             | 2.65     | 0.8043       | 0.8231       | -2.34    | 0.9057       | 0.9135       | -0.86    |
|                                          | 1.58                                   | 0.55         | 0.5047      | 8.24     | 2.15           | 2.09              | 2.78     | 0.9905         | 0.9417             | 4.93     | 1.0578       | 1.0689       | -1.05    | 1.1661       | 1.1643       | 0.15     |
|                                          | 2.37                                   | 0.71         | 0.6403      | 9.82     | 2.62           | 2.47              | 5.86     | 1.2142         | 1.1567             | 4.74     | 1.2961       | 1.2523       | 3.38     | 1.4487       | 1.3551       | 6.46     |
|                                          | 3.18                                   | 0.79         | 0.7113      | 9.96     | 2.99           | 2.81              | 6.12     | 1.3625         | 1.2865             | 5.58     | 1.4519       | 1.383        | 4.75     | 1.5966       | 1.496        | 6.3      |
|                                          | 4.73                                   | 0.86         | 0.7996      | 7.02     | 3.26           | 3.11              | 4.53     | 1.4755         | 1.3964             | 5.36     | 1.5438       | 1.5148       | 1.88     | 1.703        | 1.6495       | 3.14     |
|                                          | 6.27                                   | 0.86         | 0.9025      | -4.94    | 3.29           | 3.41              | -3.51    | 1.4802         | 1.5144             | -2.31    | 1.5494       | 1.6098       | -3.9     | 1.7109       | 1.7667       | -3.26    |

\*  $q_{e,exp.}$ :  $q_e$  experimentally and \*\*  $q_{e,cal.}$ , calculated  $q_e$  mathematically from the equation. Both unit: in mmol Cu.g<sup>-1</sup>

## List of Figures

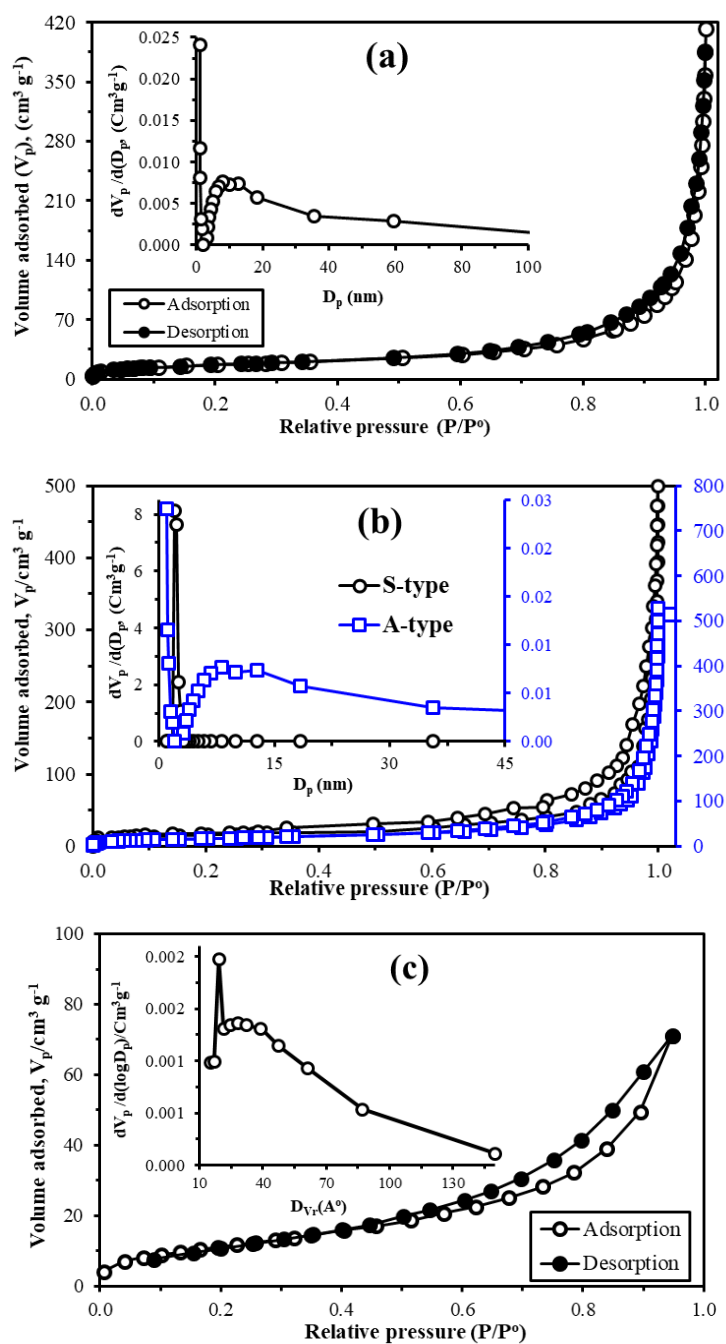

**Figure S1.** Textural characterization of TA-type (a), S-type, A-type (b), and C-type (c): BET surface area analysis and Pore size analysis (insert).

| Parameter                                 | TA-type | S-type | A-type | C-type |
|-------------------------------------------|---------|--------|--------|--------|
| SSA ( $\text{m}^2 \text{g}^{-1}$ )        | 75.27   | 61.052 | 60.382 | 42.56  |
| $V_P$ ( $\text{cm}^3 \text{STP g}^{-1}$ ) | 0.5696  | 0.4105 | 0.3598 | 0.1134 |
| Mean pore diameter (nm)                   | 27.533  | 26.997 | 22.466 | 3.839  |

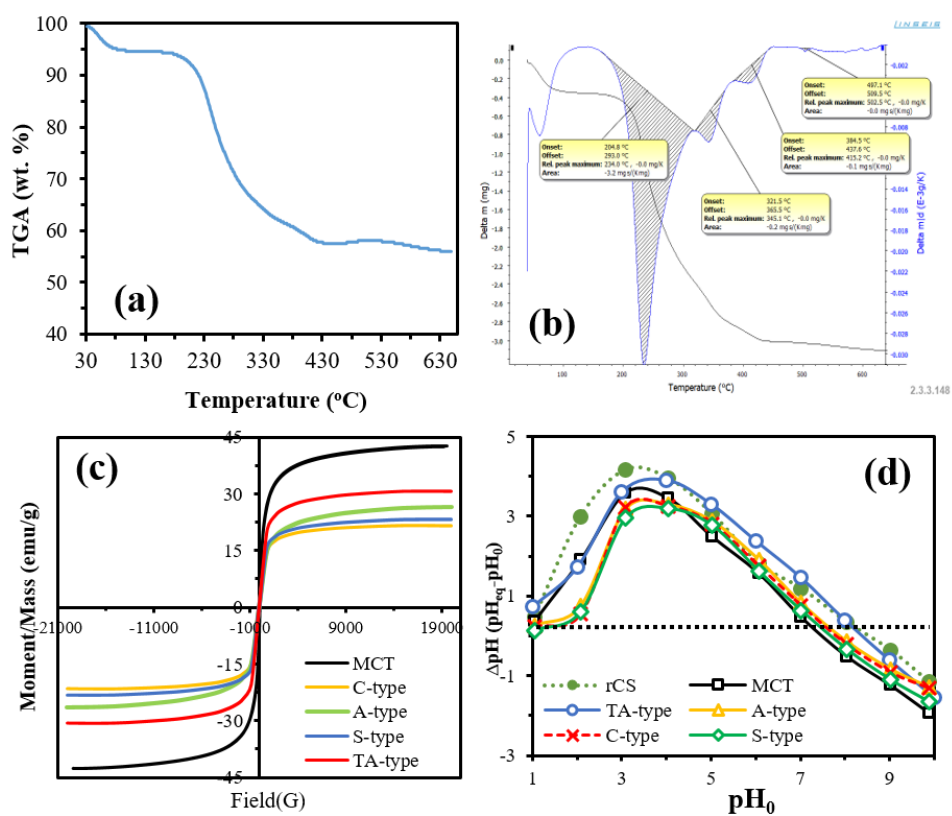

**Figure S2.** Thermogravimetric analysis of S-type nanohybrid: TGA (a) and DTG (b), magnetization curves (c) and the pH<sub>ZPC</sub> of rCS, MCS, and all nanohybrids (d).

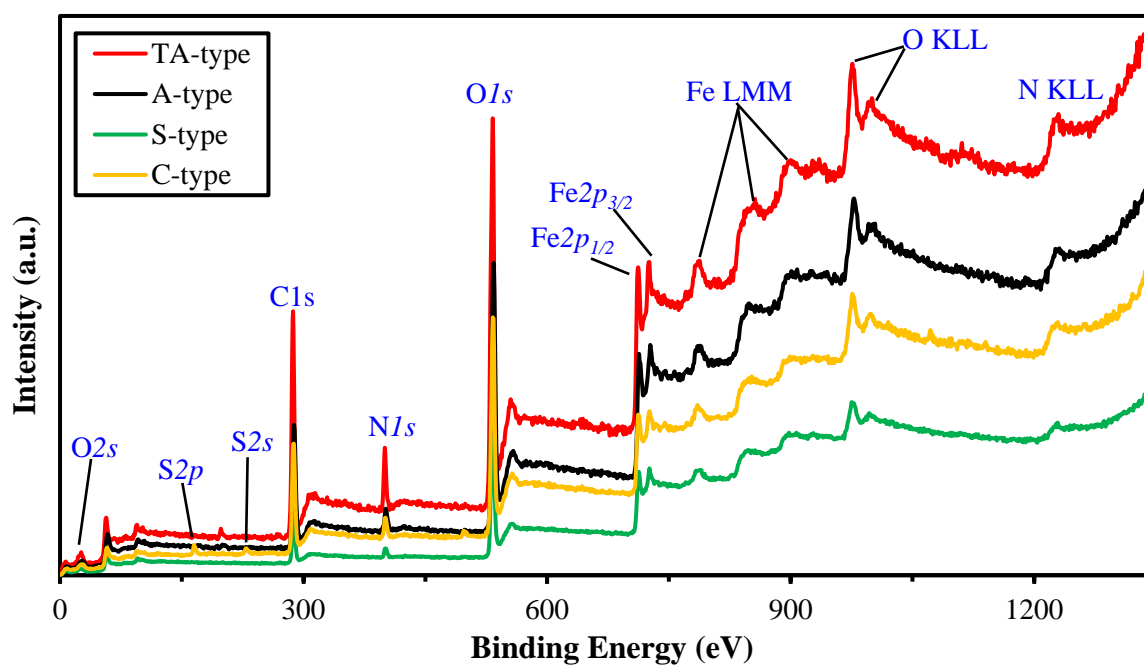

**Figure S3.** XPS survey spectra of TA-type, A-type, S-type and C-type nanocomposites.



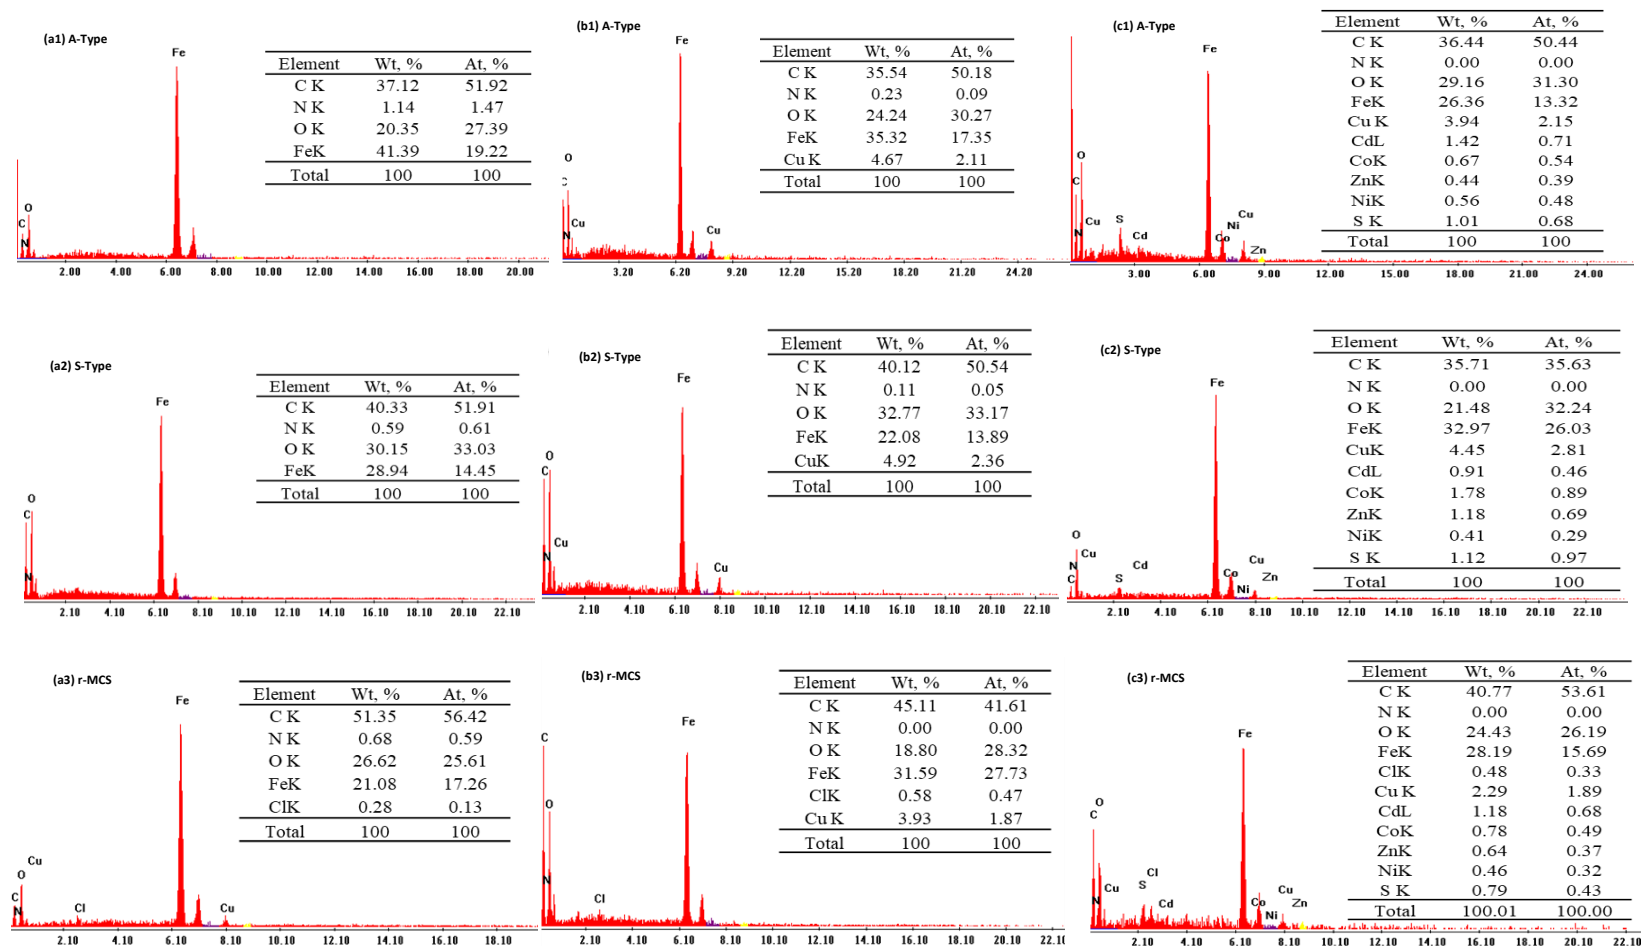

**Figure S4.** EDX measurements of raw r-MCS, A-type, and S-type materials before (a), and after Cu(II) adsorption from synthetic solution (b), and mixed system(c).

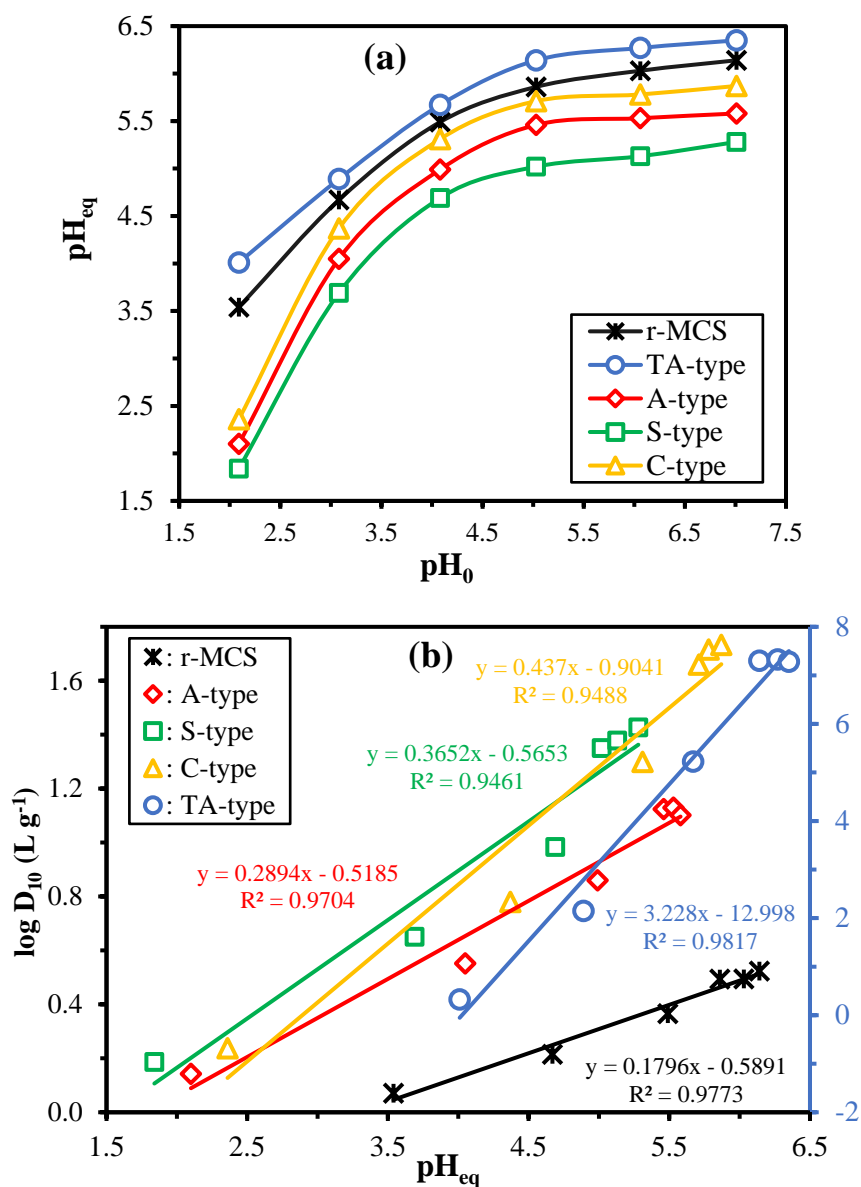

**Figure S5.** Effect of initial pH versus equilibrium pH (a) and Plot of distribution ratio ( $D$ ,  $\text{L g}^{-1}$ ) vs.  $\text{pH}_{\text{eq}}$  (b). ( $C_0$ :  $1.0 \text{ mmol L}^{-1}$ ;  $T$ :  $25 \text{ }^\circ\text{C}$ ;  $SD$ :  $0.5 \text{ g L}^{-1}$ ; agitation time: 12 h).

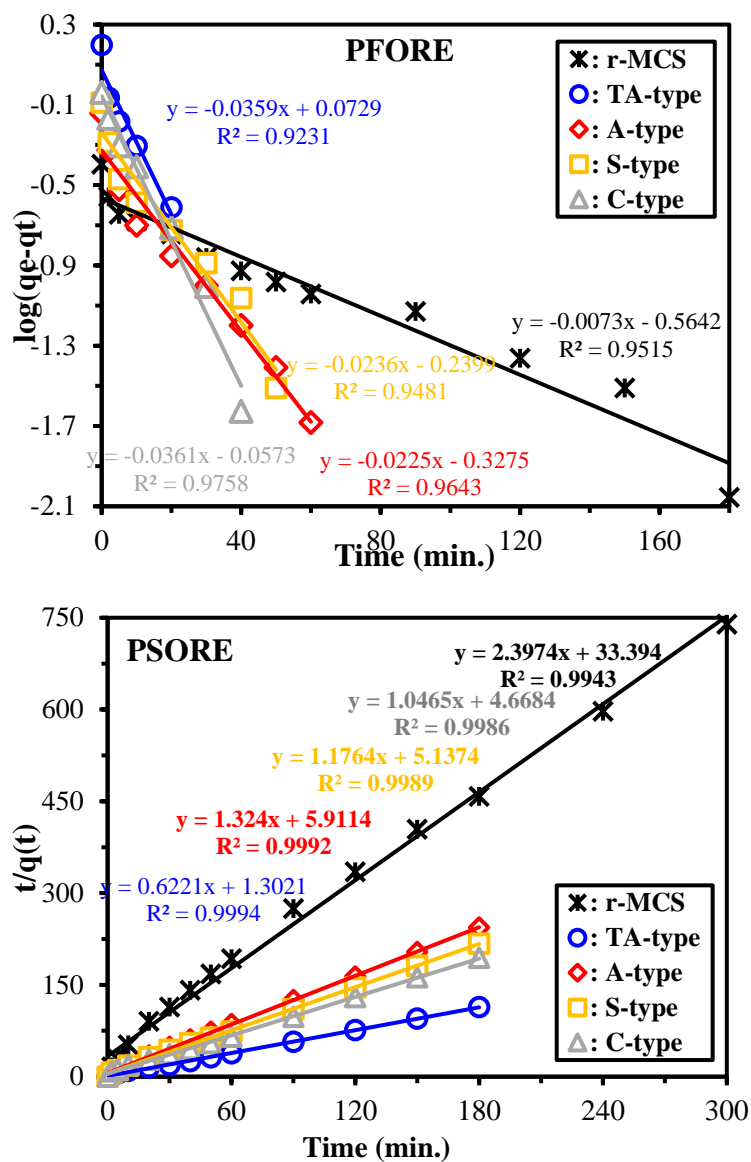

**Figure S6.** Kinetics models PFORE and PSORE for Cu(II) sorption. (pH<sub>0</sub>: 5.05, C<sub>0</sub>: 1.0 mmol Cu L<sup>-1</sup>, SD: 0.5 g L<sup>-1</sup>, Temp.: 298 K, agitation speed: 150 rpm).

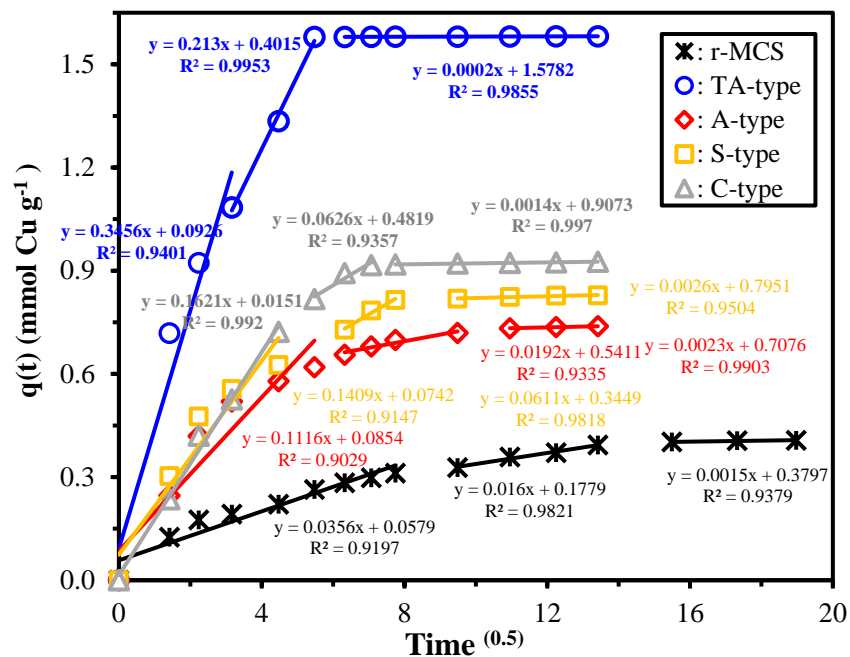

**Figure S7.** Kinetics models of interparticle diffusion for Cu(II) adsorption. (pH<sub>0</sub>: 5.05, C<sub>0</sub>: 1.0 mmol Cu L<sup>-1</sup>, SD: 0.5 g L<sup>-1</sup>, Temp.: 298 K, agitation speed: 150 rpm).

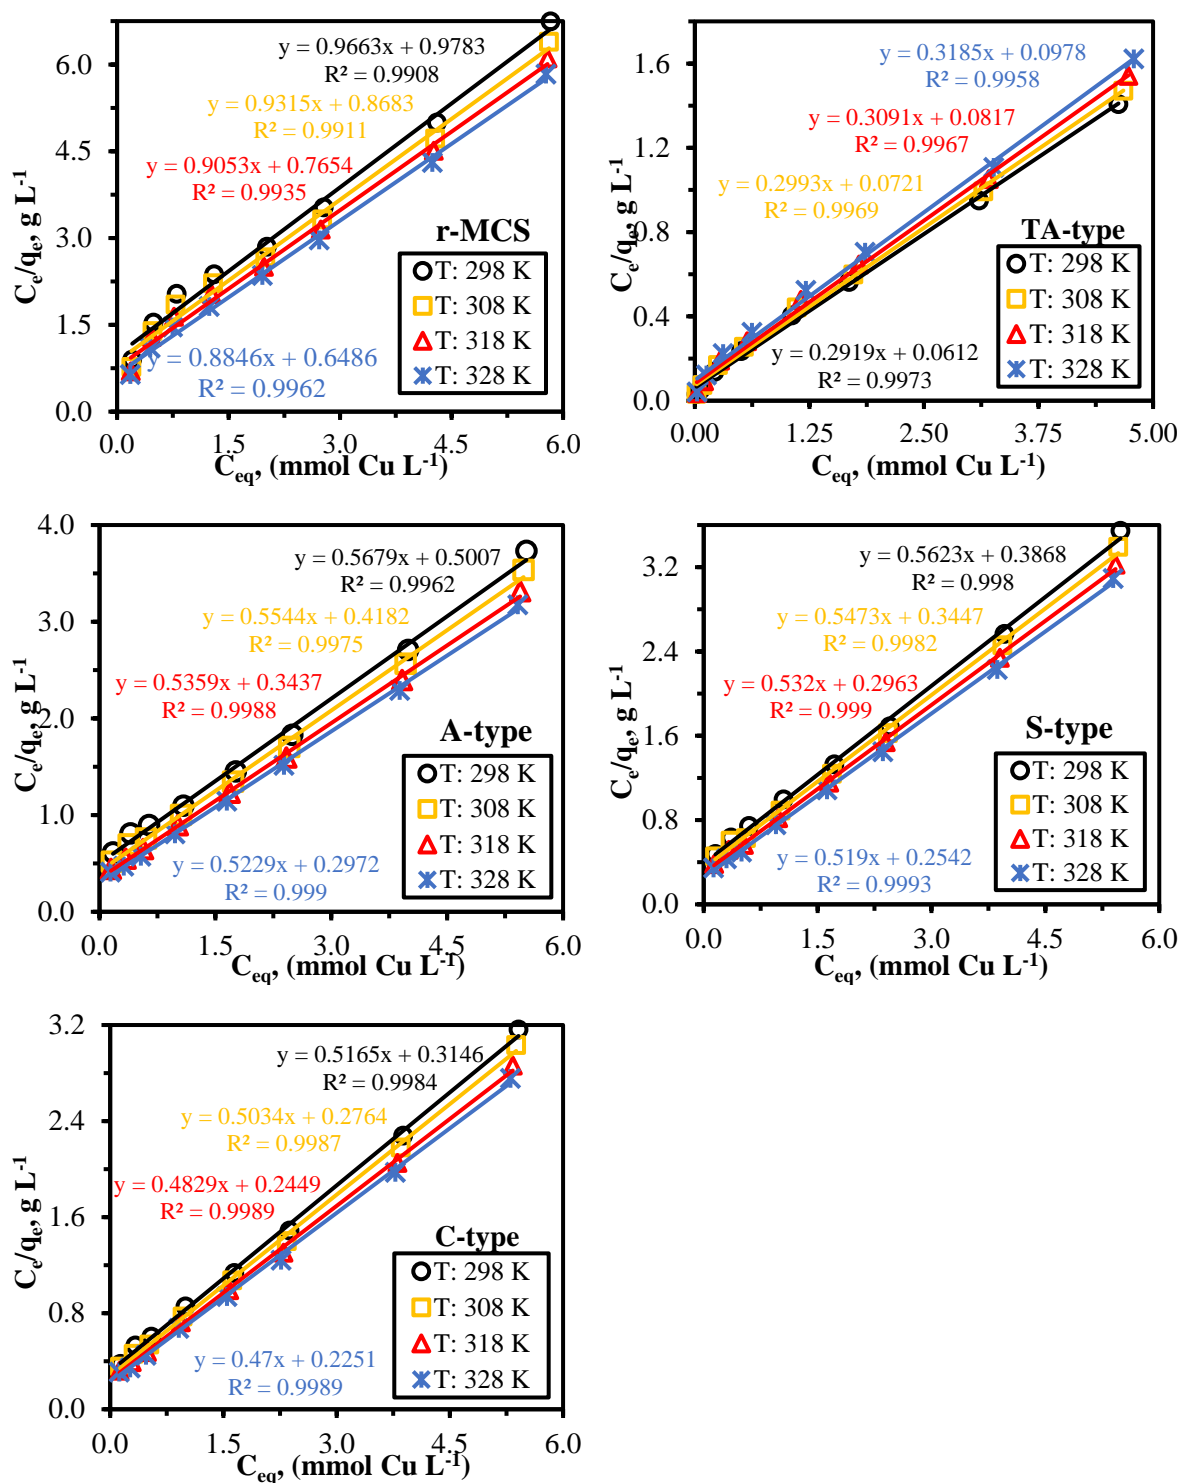

**Figure S8a.** Langmuir Isotherm models for Cu(II) sorption. (pH<sub>0</sub>: 5.0, C<sub>0</sub>: 0.067-1.467 mmol Cu L<sup>-1</sup>, SD: 0.5 g L<sup>-1</sup>, Temp.: 298-328 K, agitation speed: 150 rpm).

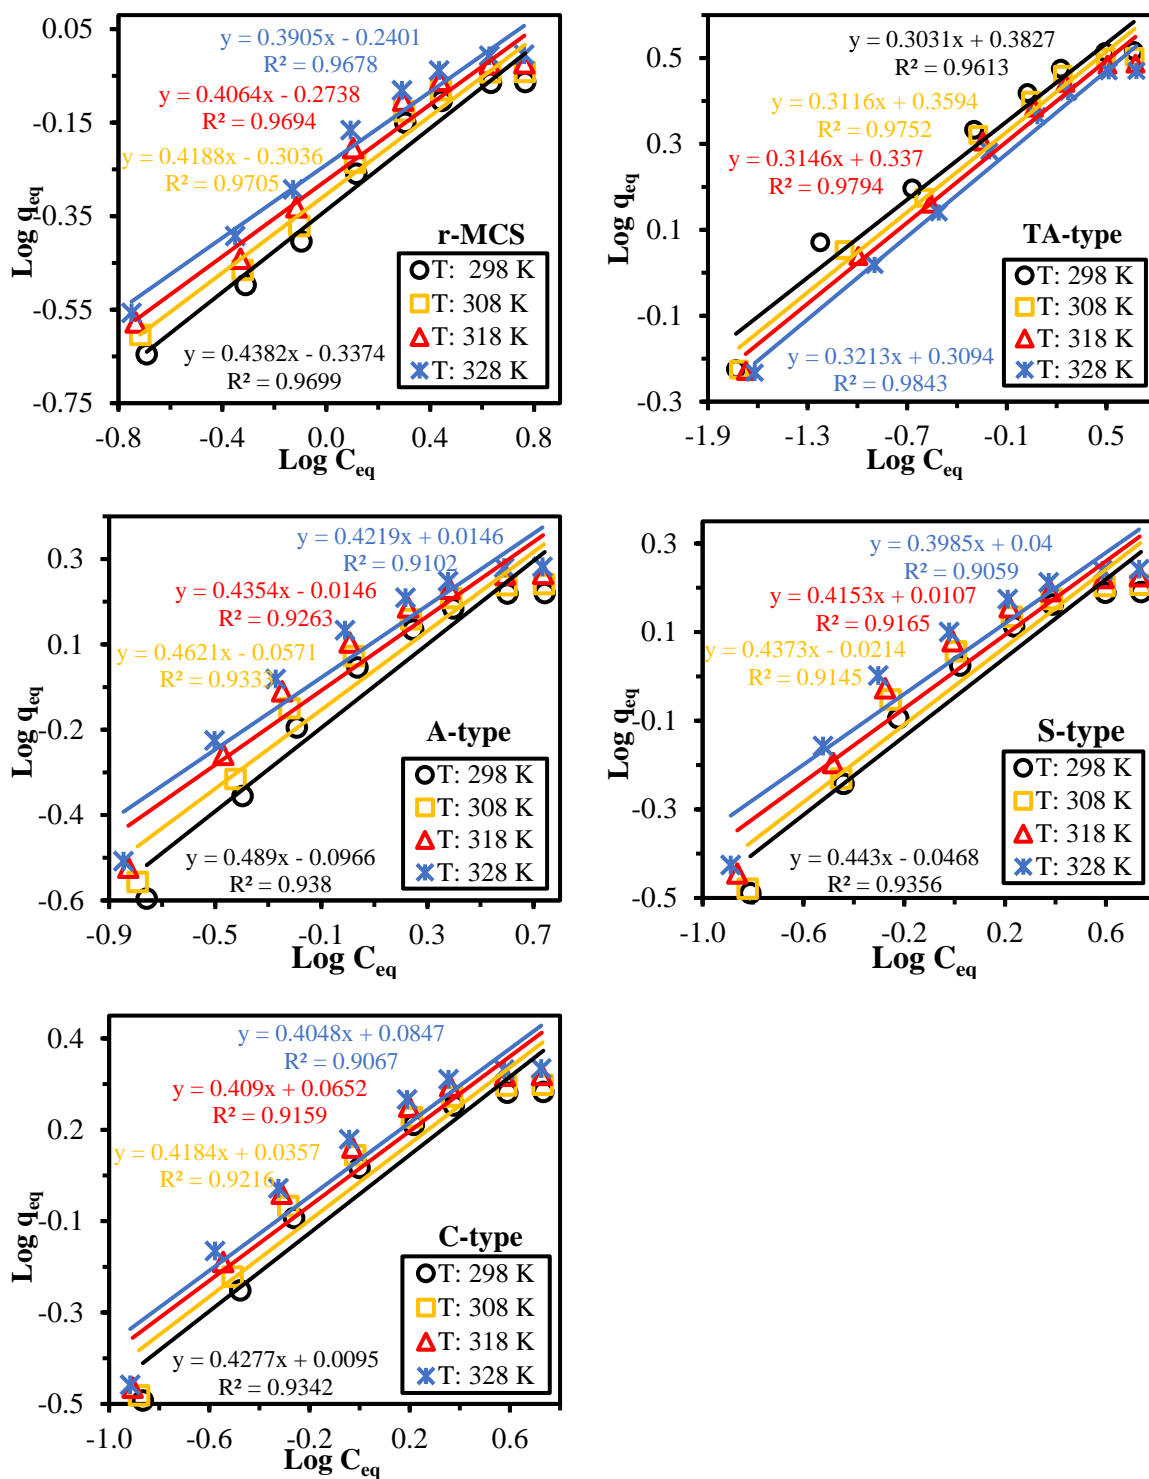

**Figure S8b.** Freundlich isotherm models for Cu(II) sorption. (pH: 5.0,  $C_0$ : 0.067-1.467 mmol Cu L<sup>-1</sup>, SD: 0.5 g L<sup>-1</sup>, Temp.:298-328 K, agitation speed: 150 rpm).

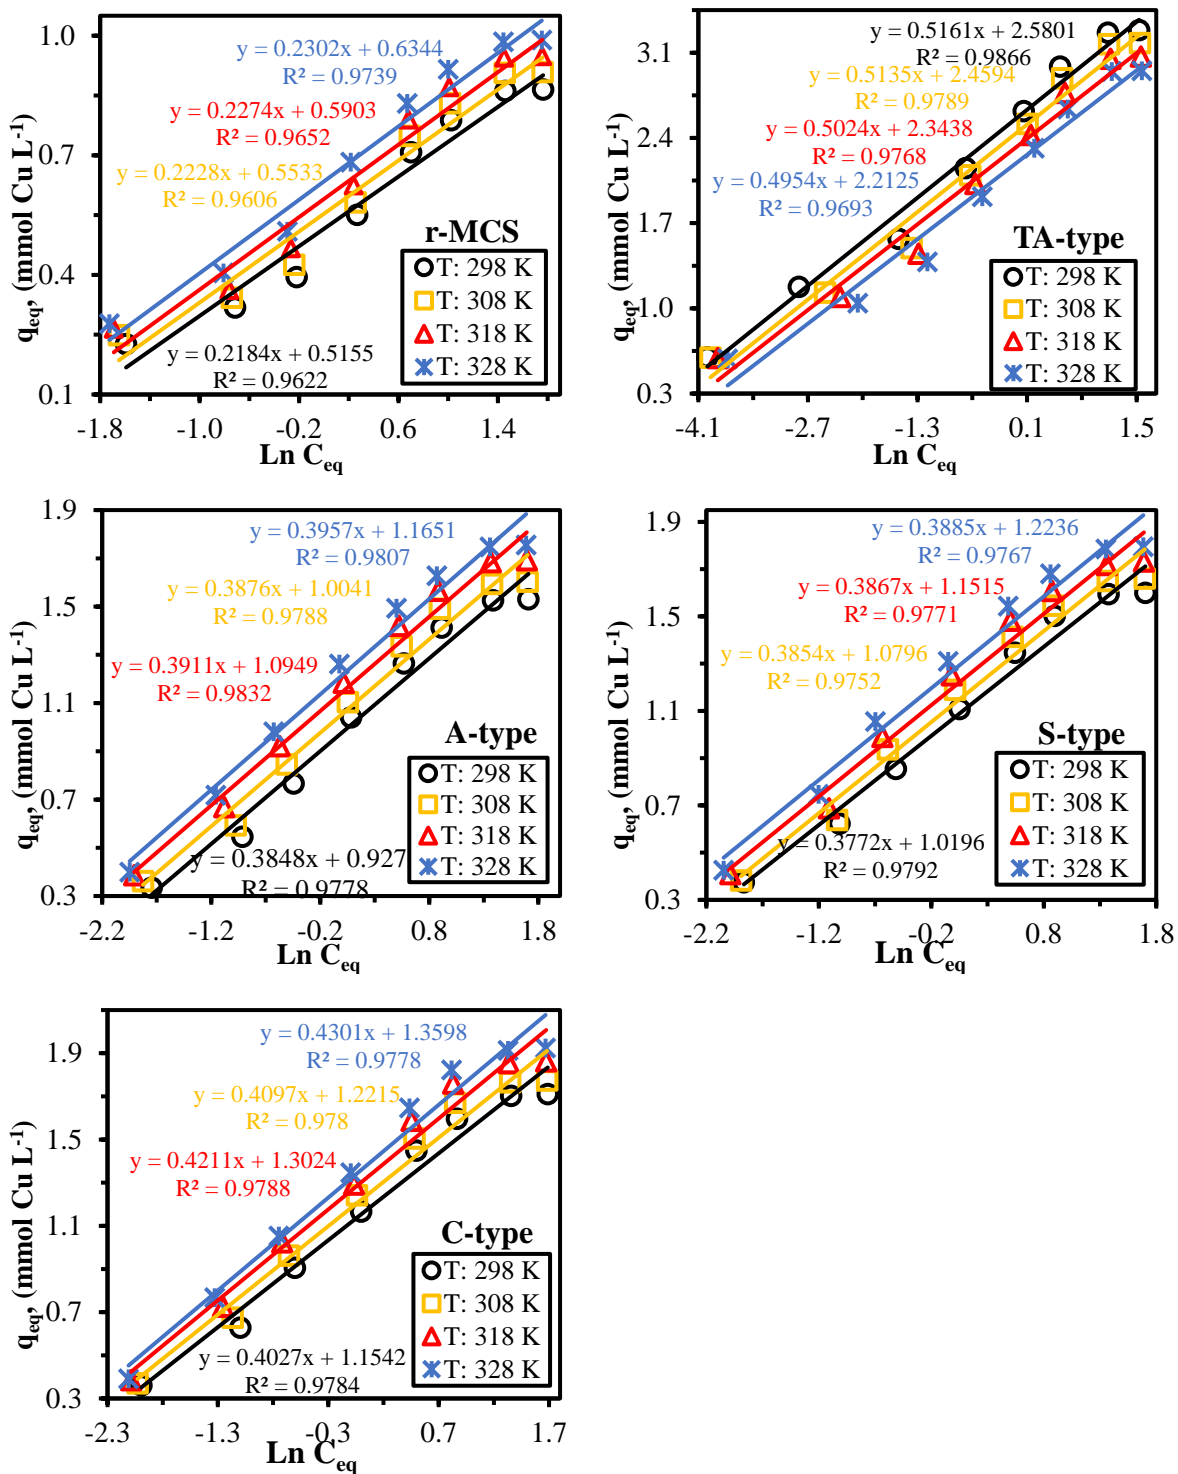

**Figure S8c.** Temkin isotherm models for Cu(II) sorption. (pH<sub>0</sub>: 5.0, C<sub>0</sub>: 0.067-1.467 mmol Cu L<sup>-1</sup>, SD: 0.5 g L<sup>-1</sup>, Temp.:298-328 K, agitation speed: 150 rpm).

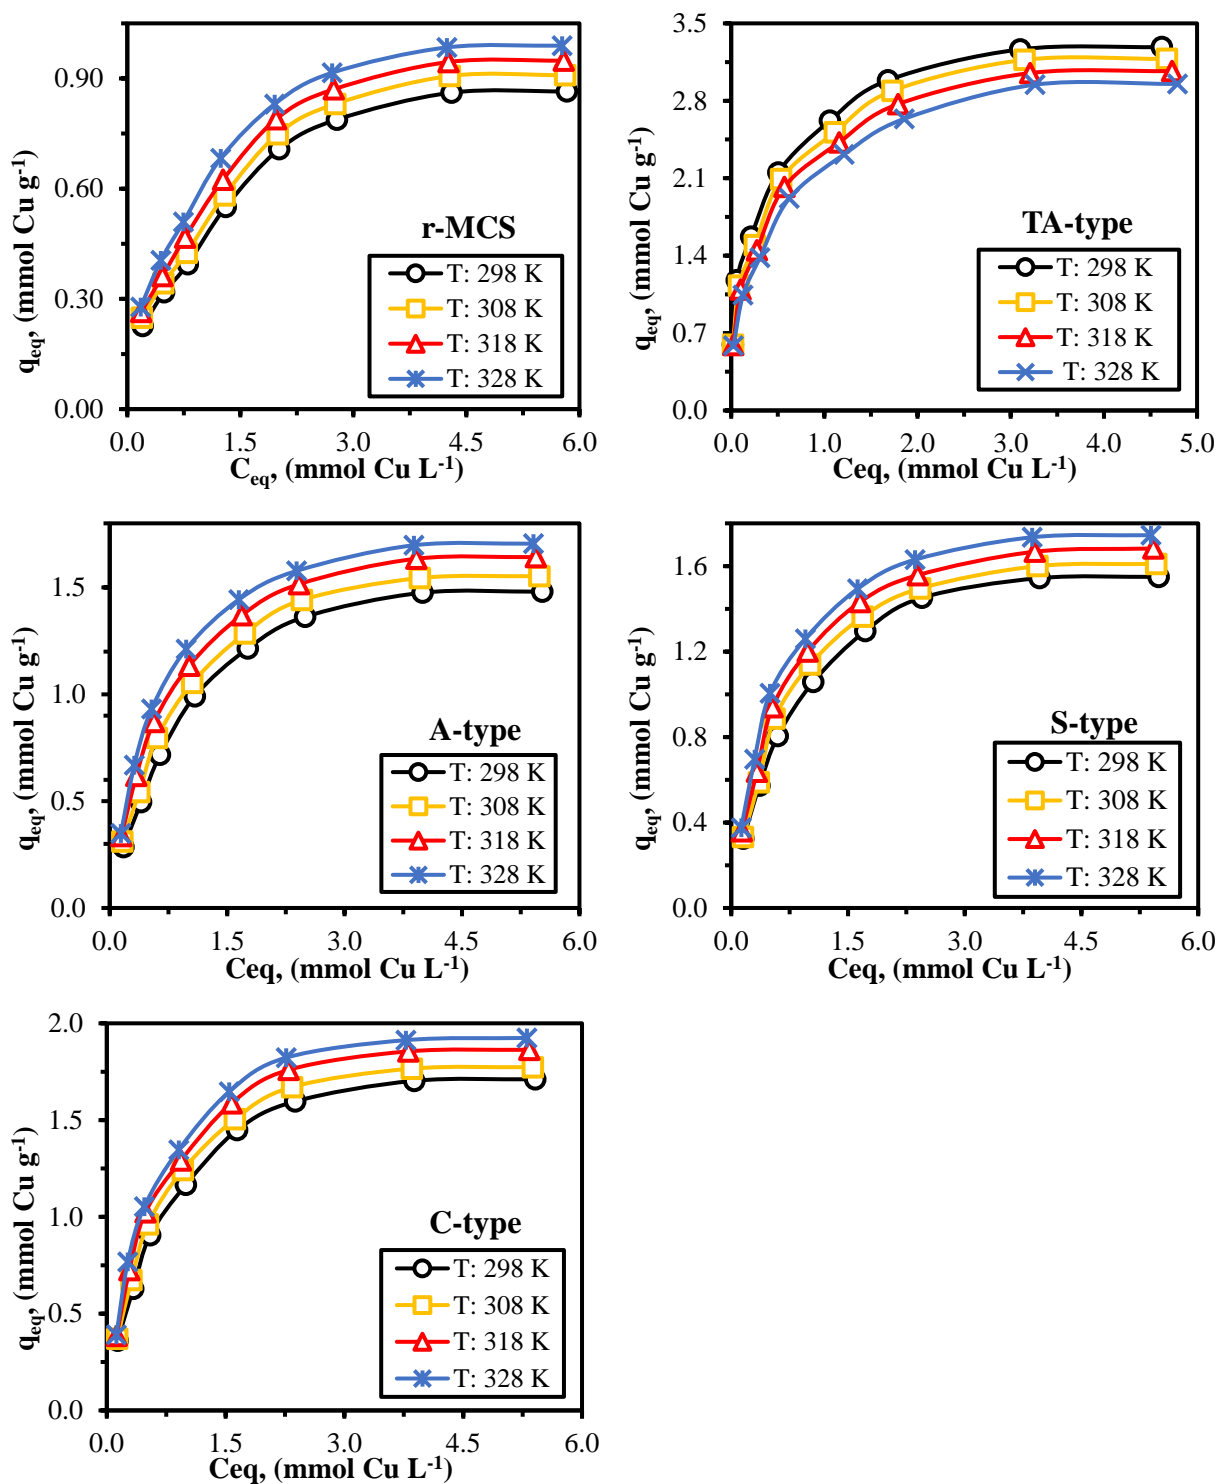

**Figure S9.** Sorption isotherms for all adsorbents types at different temperatures. (pH<sub>0</sub>: 5.06;  $C_0$ : 0.317-6.265  $\text{mmol Cu L}^{-1}$ ; SD: 0.5  $\text{g L}^{-1}$ , Temp, (i.e. T: 298, 308, 318, and 328 K), time: 120 min for TA-, A-, S-, and C-type, and 240 min for r-MCS).



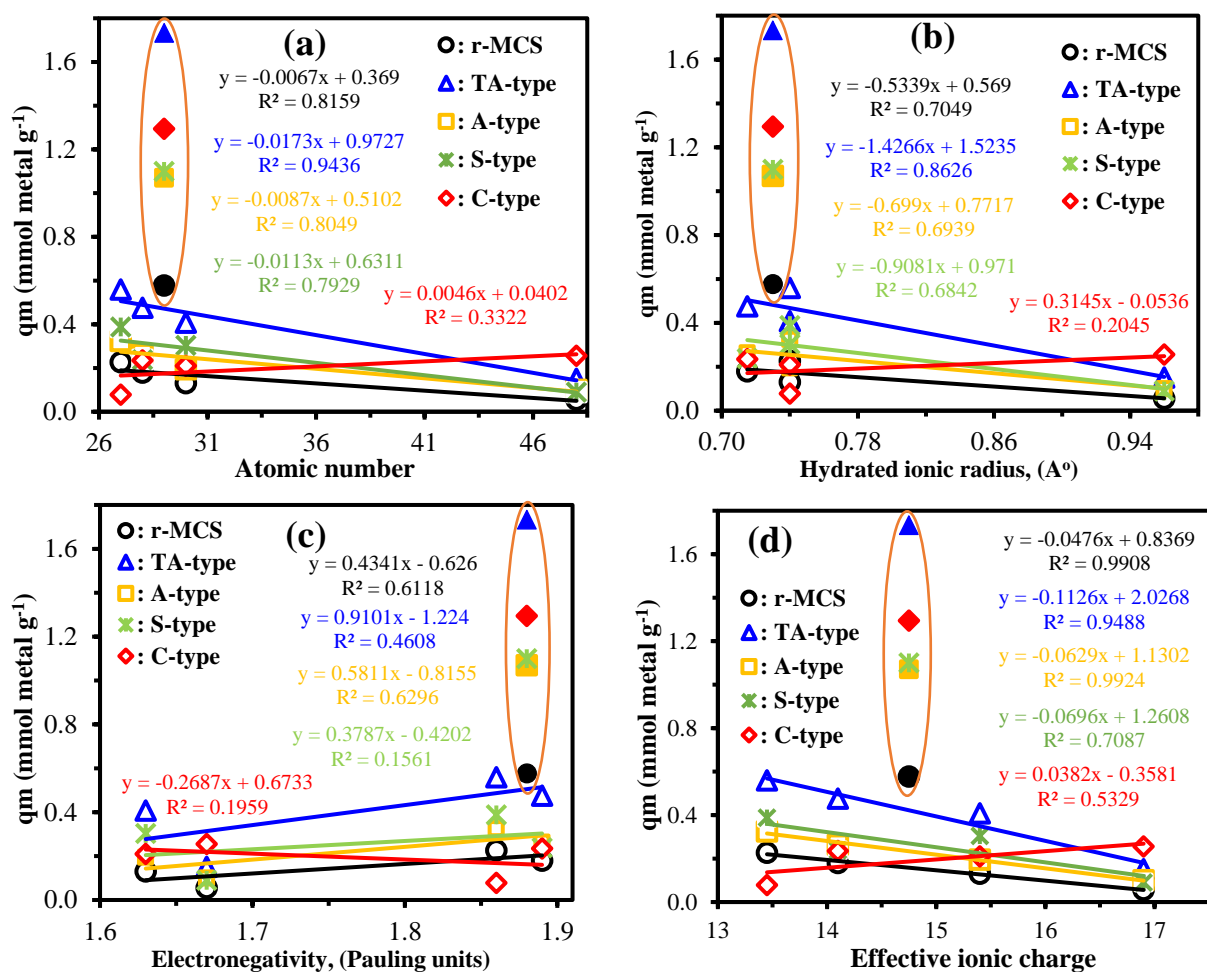

**Figure S10.** Correlation between intrinsic physicochemical characteristics (atomic number (a), hydrated ionic radius (b), electronegativity (c), and effective ionic charge (d)) and their sorption capacities ( $q_m$ ).

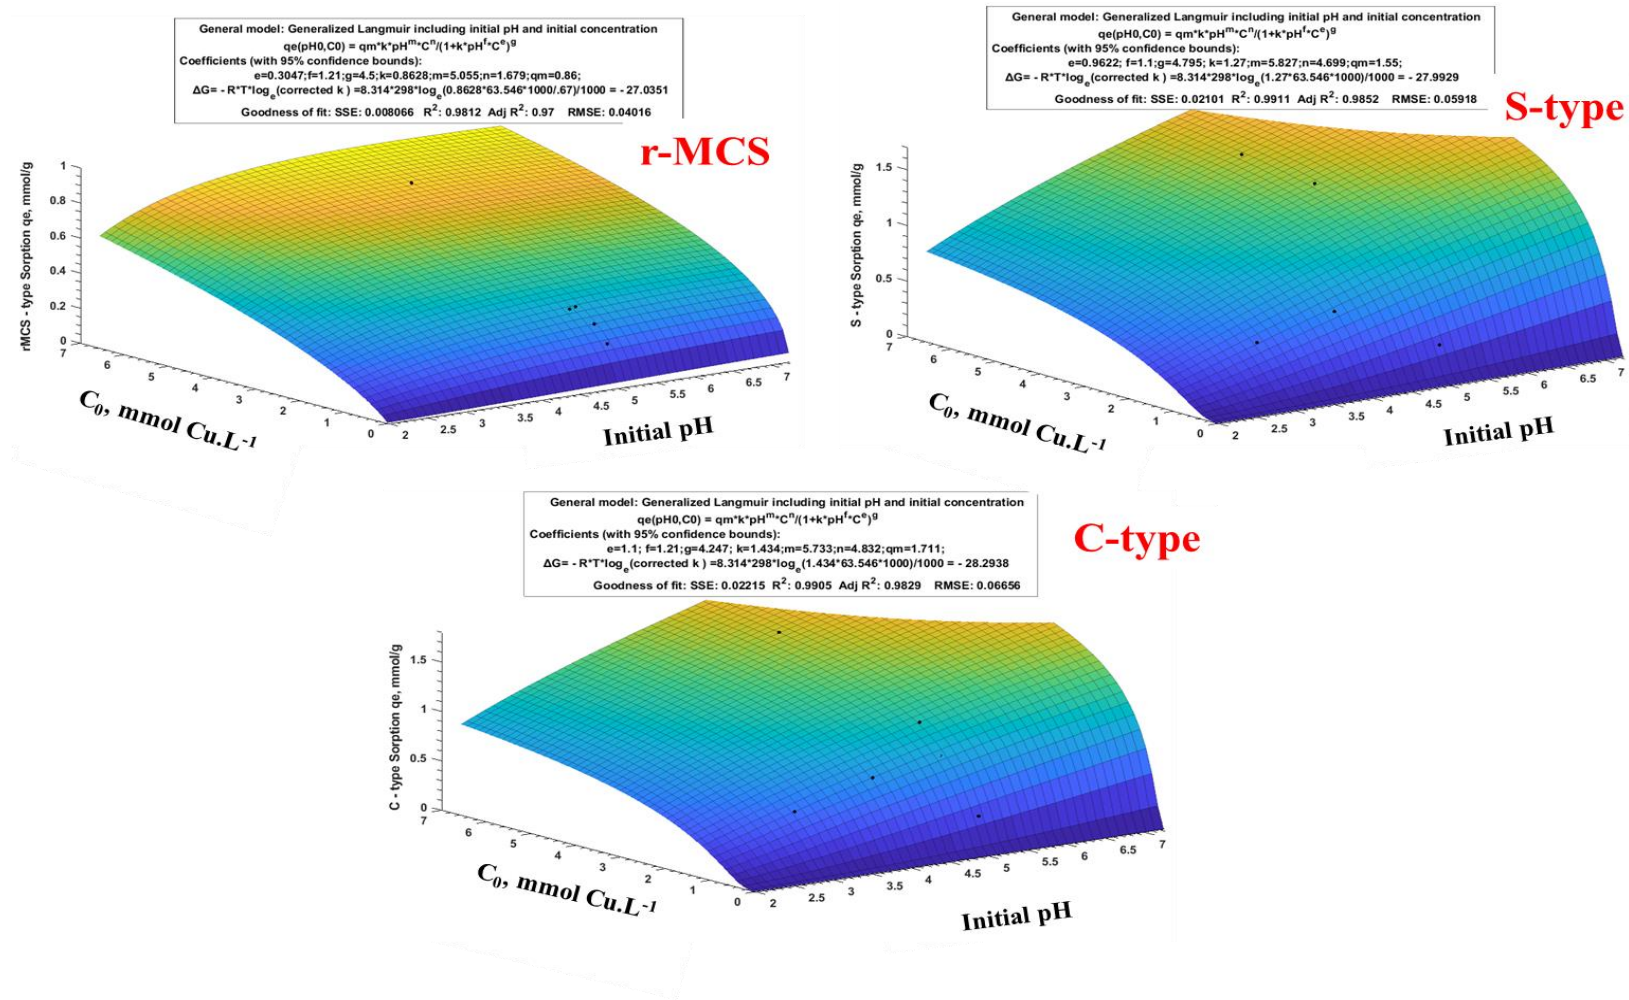

**Figure S11.** Generalized Langmuir including initial pH and initial Cu(II) concentration.

## Reference

- [1] A. Benettayeb, A. Morsli, K.Z. Elwakeel, M.F. Hamza, E. Guibal, Recovery of heavy metal ions using magnetic glycine-modified chitosan—Application to aqueous solutions and tailing leachate, *Appl. Sci.* 11 (2021) 8377.
- [2] A.A. Galhoum, T. Akashi, M. Linnolahti, J.T. Hirvi, A.G. Al-Sehemid, A. Kalam, E. Guibal, Functionalization of poly(glycidylmethacrylate) with iminodiacetate and imino phosphonate groups for enhanced sorption of neodymium - sorption performance and molecular modeling, *React. Funct. Polym.* 180 (2022) 105389.
- [3] C. Tien, *Adsorption calculations and modeling*, Butterworth-Heinemann, Boston, 1994.
- [4] A.A. Al-Ghamdi, A.A. Galhoum, A. Alshahrie, Y.A. Al-Turki, A.M. Al-Amri, S. Wageh, Mechanistic studies of uranyl interaction with functionalized mesoporous chitosan-superparamagnetic nanocomposites for selective sorption: Characterization and sorption performance, *Mater. Today Commun.* 33 (2022) 104536.
- [5] J. Coates, Interpretation of infrared spectra: A practical Approach. In *Encyclopedia of analytical chemistry*, John Wiley & Sons Ltd, Chichester 2000.
- [6] A.A. Galhoum, M.G. Mahfouz, N.M. Goma, T. Vincent, E. Guibal, Chemical modifications of chitosan nano-based magnetic particles for enhanced uranyl sorption, *Hydrometallurgy* 168 (2017) 127-134.
- [7] S.M. Pourmortazavi, H. Sahebi, H. Zandavar, S. Mirsadeghi, Fabrication of Fe<sub>3</sub>O<sub>4</sub> nanoparticles coated by extracted shrimp peels chitosan as sustainable adsorbents for removal of chromium contaminants from wastewater: The design of experiment, *Compos. B. Eng.* 175 (2019) 107130.
- [8] S.Y. Oh, D.I. Yoo, Y. Shin, H.C. Kim, H.Y. Kim, Y.S. Chung, W.H. Park, J.H. Youk, Crystalline structure analysis of cellulose treated with sodium hydroxide and carbon dioxide by means of X-ray diffraction and FTIR spectroscopy, *Carbohydr. Res.* 340(15) (2005) 2376-2391.
- [9] A.A. Al-Ghamdi, A.A. Galhoum, A. Alshahrie, Y.A. Al-Turki, A.M. Al-Amri, S. Wageh, Mesoporous magnetic cysteine functionalized chitosan nanocomposite for selective uranyl ions sorption: experimental, structural characterization, and mechanistic studies, *Polymers* 14 (2022) 2568.
- [10] M. Yamaura, R.L. Camilo, L.C. Sampaio, M.A. Macêdo, M. Nakamura, H.E. Toma, Preparation and characterization of (3-aminopropyl)triethoxysilane-coated magnetite nanoparticles, *J. Magn. Magn. Mater.* 279 (2004) 210-217.
- [11] N.A. Alghamdi, Mesoporous magnetic-polyaminated-chitosan nanocomposite for selective uranium removal: performance and mechanistic studies *Int. J. Environ. Sci. Technol.* (2022) <https://doi.10.1007/s13762-022-04565-2>
- [12] M. Stoia, R. Istrate, C. Păcurariu, Investigation of magnetite nanoparticles stability in air by thermal analysis and FTIR spectroscopy, *J. Therm. Anal. Calorim.* 125(3) (2016) 1185-1198.
